# Supplementary material
Source: Elsevier journal article supplement (https://www.sciencedirect.com/science/article/pii/S1576988722000012)
Supplement: mmc1 [file S1576988722000012:mmc1.docx]

# **MATERIAL SUPLEMENTARIO**

# Cuestionario encuesta: cobertura vacunal entre profesionales sanitarios


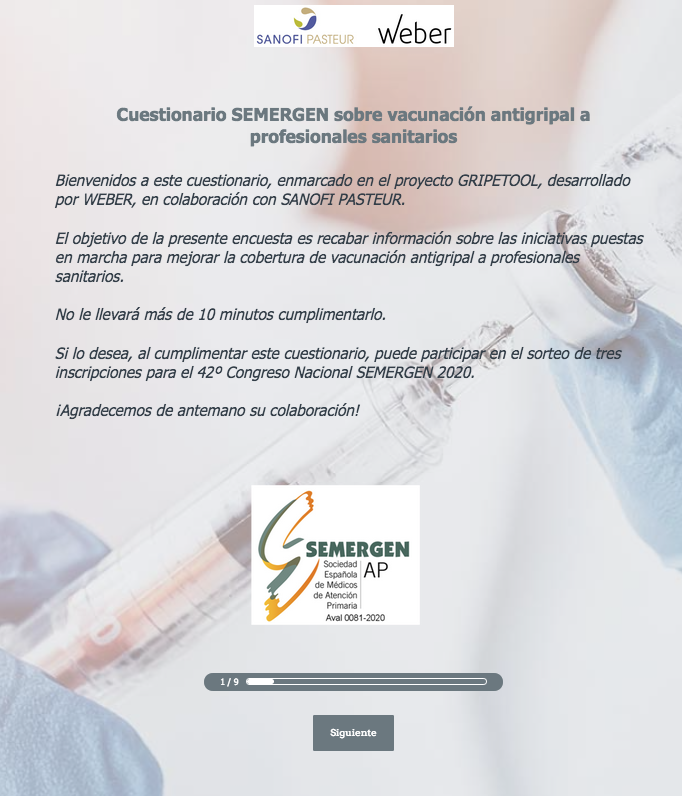


**BLOQUE I: CARACTERÍSTICAS DEL PROFESIONAL**

- **Género:** Femenino/Masculino
- **Edad:** Menos de 40 años / 40-49 años / 50-59 años / 60 años o más
- **Código postal** de su centro de trabajo
- **Comunidad Autónoma** donde está ubicado dicho centro
- **¿Se ha vacunado usted contra la gripe en esta campaña o en las dos anteriores?** Sí/No
  - Si la respuesta anterior es no, indique el motivo por el que no se vacunó contra la gripe: Baja efectividad de la vacuna / Bajo riesgo de infección / Efectos secundarios de la vacuna / Otros (indique cual)
  - Si la respuesta anterior es sí, indique la razón o razones por las que se ha vacunado contra la gripe: protegerme a mí / proteger a los demás (mi entorno familiar y profesional) / Ser un ejemplo / Otra (indique cual)

**BLOQUE II: INICIATIVAS PARA MEJORAR LA COBERTURA VACUNAL**

**Tipo de iniciativas**. Indique qué iniciativas se han implementado durante la campaña 2019/2020 desde su centro sanitario y/o consejería de sanidad para mantener/aumentar el número de profesionales sanitarios (médicos de AP, enfermería, etc.) vacunadas de gripe, en los siguientes tres ámbitos de actuación.

|  | **Medida** | **No se lleva a cabo** | **Se puso en marcha esta campaña por 1ª vez** | **Lleva entre 1 y 4 años vigente** | **Lleva vigente 5 años o más** | **NS/NC** |
| --- | --- | --- | --- | --- | --- | --- |
| **Documentación o recomendaciones institucionales** | | | | | | |
| 1 | Publicación de recomendaciones de vacunación |  |  |  |  |  |
| 2 | Elaboración y publicación de protocolos y guías técnicas por parte de autoridades sanitarias, sociedades científicas, etc. |  |  |  |  |  |
| 3 | Inclusión de nuevas estrategias en la cartera de servicios para mejorar las coberturas en los Planes de Salud |  |  |  |  |  |
|  | Otra: (indique) _________ |  |  |  |  |  |
| **Actividad de difusión de la campaña** | | | | | | |
| 4 | Distribución de carteles en los centros sanitarios |  |  |  |  |  |
| 5 | Publicación de audios y/o vídeos |  |  |  |  |  |
| 6 | Actividad en medios de comunicación y/o redes sociales |  |  |  |  |  |
| 7 | Web/sección web específica en la Consejería de Salud sobre la gripe y/o su vacunación |  |  |  |  |  |
| 8 | Envío de correo electrónico y/o cartas personalizadas |  |  |  |  |  |
|  | Otra: (indique) _________ |  |  |  |  |  |
| **Actividades para fomentar la implicación de profesionales en la vacunación** | | | | | | |
| 9 | Incentivos (remuneración por productividad variable, asistencia a congresos, etc.) |  |  |  |  |  |
| 10 | Comunicación a los profesionales de nuevas estrategias |  |  |  |  |  |
| 11 | Invitación a los profesionales para participar en el diseño e implementación de nuevas estrategias dirigidas a aumentar las coberturas de vacunación |  |  |  |  |  |
| 12 | Formación y actualización en gripe y vacuna antigripal |  |  |  |  |  |
| 13 | Recordatorio informático del registro de cobertura de vacunación de profesionales sanitarios |  |  |  |  |  |
| 14 | Reporte al profesional con los datos específicos de su centro de trabajo |  |  |  |  |  |
| 15 | Reuniones dirigidas a profesionales sanitarios de concienciación de la necesidad de vacunación |  |  |  |  |  |
|  | Otra: (indique) _________ |  |  |  |  |  |

- **Grado de excelencia.** De las iniciativas que ha seleccionado como vigentes, valore en qué medida la implementación ha sido óptima, siendo 10 la máxima puntuación posible y 0 la mínima.
- **Percepción sobre efectividad.**
  - Para cada bloque de iniciativas descritas a continuación, elija las dos opciones de cada grupo que, según su criterio, representen las medidas con mayor capacidad para aumentar la tasa de cobertura antigripal entre los profesionales sanitarios.
  - De entre las iniciativas que ha marcado en la pregunta anterior, indique por favor únicamente las 3 medidas que le parecen más efectivas (siendo 1 la medida con mayor capacidad para aumentar la tasa de cobertura antigripal entre los profesionales sanitarios, 2 la segunda medida con mayor capacidad y 3 la tercera medida con mayor capacidad). Deje en blanco aquellas que considere menos efectivas.
- **Futuro**. ¿Qué otras iniciativas adicionales cree que deberían ponerse en marcha en su centro y/o región para aumentar la cobertura vacunal en este colectivo?

**BLOQUE III: COBERTURA VACUNAL**

- Para terminar la encuesta, necesitamos recabar información sobre la cobertura de vacunación antigripal a profesionales sanitarios en su entorno. Por favor, especifique el porcentaje aproximado de profesionales sanitarios de su centro que se han vacunado contra la gripe en esta campaña y en la anterior. [20 rangos predeterminados posibles, entre el 0-5% y el 95-100%; para la campaña 2019-2020 y para la campaña 2018-2019]
